# Supplementary material
Source: publisher figshare collection journal article supplement (https://gsajournals.figshare.com/ndownloader/files/28534143)
Supplement: Supplementary file 1 [file 28534143]

## Sheet: clampi1
Gene ID	egfpi vs. clampi1 Fold Change (0-1.5 hr)
5-HT1A	-2.00782
7B2	-3.25764
AANAT1	-4.69641
AANATL2	-6.34588
AANATL7	-4.1211
Ace	-2.02658
Acp95EF	-4.01193
ACXE	-4.01194
Adgf-C	-19.0347
Adgf-D	-2.155
alpha-Catr	-2.4371
AQP	-8.96949
Arr2	-3.83458
AstCC	-6.40141
atilla	-177.864
B9d1	-2.67156
bab1	-19.3179
bma	-6.49347
bt	-2.39314
btl	-2.09016
Buffy	-13.5
CadN2	-4.85325
CanA1	-5.93339
Cbp53E	-113.125
Cda9	-7.24325
CG10140	-2.23361
CG10168	-4.54259
CG10205	-7.08593
CG10311	-5.30572
CG10553	-2.76683
CG10592	-4.39495
CG10621	-2.11962
CG10657	-20.8404
CG10761	-3.71243
CG10764	-3.0678
CG10793	-4.01854
CG10859	-2.20158
CG10931	-4.01004
CG10993	-3.84293
CG11023	-14.9869
CG11029	-2.14359
CG11068	-4.01191
CG1124	-3.67358
CG11251	-4.49199
CG1139	-6.59891
CG1143	-27.4054
CG11598	-4.94703
CG11668	-3.30859
CG11694	-5.49475
CG11698	-4.01196
CG11703	-2.68822
CG11796	-75.1265
CG11852	-59.4825
CG12057	-7.50636
CG12105	-3.64813
CG12164	-32.7097
CG12239	-6.09288
CG12344	-2.56105
CG12541	-9.4147
CG12817	-31.5518
CG12826	-6.24292
CG12934	-74.9803
CG12963	-6.28967
CG12990	-2.31942
CG13010	-11.116
CG13038	-2.04348
CG13074	-9.68112
CG13160	-8.6134
CG13203	-2.14861
CG13217	-3.91208
CG13239	-4.55143
CG13248	-2.20243
CG13258	-10.1656
CG13428	-2.82536
CG13492	-3.70975
CG13650	-2.07579
CG13679	-6.58728
CG13693	-4.32616
CG13739	-13.6049
CG13743	-2.00948
CG13872	-8.08485
CG13924	-7.00295
CG14195	-17.7712
CG14219	-3.73981
CG14227	-2.77268
CG14274	-9.00389
CG14285	-2.27187
CG14292	-42.2935
CG14300	-46.5163
CG14313	-4.00982
CG14346	-3.5283
CG14451	-2.01715
CG14453	-7.79847
CG14457	-3.87911
CG14515	-4.36561
CG14528	-3.36046
CG14551	-38.9719
CG14572	-19.1404
CG14624	-3.89866
CG14636	-2.49627
CG1468	-69.1042
CG14692	-13.5887
CG14770	-2.05136
CG14949	-59.1773
CG14963	-3.73598
CG14982	-6.36628
CG14984	-21.5522
CG15043	-2.01529
CG15082	-13.255
CG15125	-14.6135
CG15170	-10.7573
CG15199	-2.96762
CG15201	-4.2499
CG15213	-9.1882
CG15236	-2.02451
CG15336	-3.84728
CG15353	-3.8473
CG15406	-38.1239
CG15408	-3.86036
CG15431	-2.10197
CG1545	-8.92573
CG15517	-3.81951
CG15526	-5.25734
CG15528	-2.95467
CG15533	-5.67977
CG15534	-9.28254
CG15546	-6.88139
CG15547	-2.31566
CG15579	-4.41867
CG15649	-7.25894
CG15650	-6.33848
CG15829	-2.74266
CG15865	-12.9983
CG1674	-2.3776
CG16772	-10.5916
CG16775	-6.34533
CG16825	-4.01589
CG16886	-2.97549
CG1695	-49.4391
CG16965	-2.1988
CG17032	-3.01539
CG17083	-4.01389
CG17122	-2.05707
CG17147	-6.37064
CG17207	-9.57321
CG1722	-2.9085
CG17278	-3.64785
CG17329	-2.38886
CG17549	-7.46777
CG17562	-2.75345
CG17564	-9.67091
CG17687	-4.62367
CG17906	-6.84633
CG17991	-6.91854
CG17994	-2.65441
CG18095	-2.06348
CG18258	-8.94459
CG18327	-3.40297
CG18788	-4.01193
CG2070	-6.40125
CG2120	-3.02148
CG2269	-3.92357
CG2528	-8.02983
CG2650	-2.8806
CG2680	-36.9555
CG2736	-4.2701
CG2781	-9.11467
CG2962	-3.43974
CG30037	-14.5883
CG30099	-2.28384
CG30158	-4.11139
CG30161	-2.53768
CG30172	-4.94571
CG30271	-8.52644
CG30289	-3.47018
CG30424	-2.73272
CG30427	-6.02177
CG30484	-6.7093
CG30487	-6.98104
CG31068	-6.40133
CG31106	-6.95249
CG31233	-3.81692
CG31321	-2.54814
CG31343	-190.508
CG31404	-4.01034
CG31454	-13.262
CG31464	-3.77874
CG31465	-17.5664
CG31469	-3.03704
CG31516	-18.6787
CG31661	-3.84435
CG31802	-4.0119
CG31817	-2.39129
CG31913	-4.46564
CG32036	-7.84855
CG3213	-3.37245
CG32181	-3.8478
CG32182	-2.11103
CG32199	-3.88505
CG32201	-6.98916
CG32259	-2.70708
CG32392	-13.0405
CG32432	-9.192
CG32557	-2.44896
CG32687	-2.3096
CG32706	-2.60946
CG32801	-5.0098
CG3292	-16.2305
CG33080	-2.09687
CG33099	-2.59487
CG33120	-2.09633
CG33178	-2.52322
CG33267	-7.55286
CG3328	-2.20883
CG33281	-6.47575
CG33282	-3.85036
CG33339	-4.54221
CG3348	-39.6072
CG34025	-2.5726
CG34034	-2.25862
CG34124	-2.28775
CG34136	-8.37009
CG34138	-3.84407
CG34184	-20.9426
CG34203	-4.01435
CG34232	-2.10694
CG34268	-4.63337
CG34278	-9.03813
CG34301	-15.1766
CG34307	-4.46443
CG34324	-12.8864
CG34382	-3.81754
CG34386	-2.781
CG34402	-2.21165
CG34442	-3.04812
CG34445	-4.44661
CG34454	-4.02877
CG34456	-6.38217
CG3565	-4.01192
CG3598	-29.035
CG3635	-6.59162
CG3706	-3.03294
CG3984	-13.9726
CG4096	-2.04194
CG42322	-2.64982
CG42339	-2.82424
CG42390	-3.78526
CG42494	-4.15002
CG42535	-3.84393
CG42564	-2.2837
CG42633	-8.02011
CG42741	-2.54732
CG42750	-6.55262
CG42779	-29.08
CG43348	-3.81706
CG43349	-2.86735
CG4335	-2.63264
CG43373	-3.89022
CG4362	-2.16319
CG4367	-20.227
CG44403	-3.89415
CG44405	-3.17169
CG44422	-25.5316
CG44433	-3.84975
CG4456	-4.01642
CG44569	-14.2528
CG4459	-2.28339
CG4462	-6.23079
CG44625	-3.77583
CG4577	-7.92974
CG4928	-3.76601
CG5111	-2.16065
CG5162	-8.90961
CG5177	-2.40426
CG5538	-2.66797
CG5592	-3.49879
CG5644	-4.01193
CG5715	-2.99724
CG5849	-2.37296
CG5867	-2.47874
CG5909	-3.75525
CG5910	-3.24371
CG5945	-4.4641
CG6041	-2.07074
CG6055	-6.5923
CG6125	-11.6447
CG6403	-24.1824
CG6432	-11.4761
CG6465	-2.00635
CG6472	-3.84312
CG6576	-4.01194
CG6592	-6.8284
CG6753	-2.13221
CG6901	-3.78151
CG6938	-9.50756
CG6978	-15.3056
CG6999	-3.5156
CG7024	-2.07097
CG7135	-2.62195
CG7164	-4.01198
CG7179	-4.15012
CG7191	-4.57417
CG7203	-60.5823
CG7290	-74.2313
CG7298	-13.4541
CG7299	-43.5988
CG7387	-6.01564
CG7465	-52.6699
CG7560	-4.41677
CG7589	-2.39232
CG7708	-7.26079
CG7724	-4.53386
CG7794	-9.20102
CG7916	-11.8504
CG7924	-2.86478
CG7950	-2.68894
CG7963	-11.4379
CG8008	-2.06711
CG8046	-6.13628
CG8086	-3.71331
CG8093	-3.48824
CG8117	-2.30078
CG8369	-3.00343
CG8401	-2.05167
CG8563	-10.4228
CG8564	-4.012
CG8736	-3.08809
CG8773	-2.5619
CG8834	-6.10621
CG9270	-3.44282
CG9297	-21.0556
CG9368	-2.57487
CG9394	-7.79831
CG9505	-2.25798
CG9541	-7.41309
CG9555	-9.64635
CG9568	-2.27032
CG9664	-2.41443
CG9702	-3.50512
CG9782	-2.28365
CG9813	-2.1448
CG9861	-4.01604
CG9876	-3.62041
CG9988	-4.50161
CheA29a	-3.78322
CheA7a	-4.46364
CheA84a	-3.81789
CheA87a	-3.85293
Cht4	-4.006
Cht6	-3.53789
comr	-6.62909
Corin	-2.01248
Cpr31A	-66.9029
Cpr35B	-2.18693
Cpr47Eb	-142.687
Cpr47Ec	-14.0396
Cpr47Eg	-65.9539
Cpr56F	-3.79295
Cpr64Ad	-5.8673
Cpr66Cb	-25.6181
Cpr66D	-3.30734
CR11386	-9.96675
CR33319	-21.3365
CR42490	-2.08995
cry	-2.29745
Cyp28d1	-7.83888
Cyp303a1	-3.76934
Cyp4aa1	-2.8601
Cyp4ac1	-4.9958
Cyp4ac2	-9.96972
Cyp4d1	-11.5588
Cyp4d14	-2.93385
Cyp4g1	-2.4486
Cyp6a8	-4.42618
Cyp6g2	-25.5692
dac	-2.20146
Damm	-4.47738
daw	-3.72459
Desi	-30.4066
Dh31	-13.5317
Dh31-R	-2.76346
Dh44	-12.2958
Dic61B	-24.2909
dpr17	-2.41774
dpr2	-14.084
dpr21	-6.45788
dpr3	-27.9053
dsb	-6.45432
Dtg	-2.22416
Edg78E	-4.57
Eh	-3.86867
Elal	-3.76168
Est-Q	-3.23914
Esyt2	-4.24309
etaTry	-6.49016
FASN2	-4.99906
fd96Cb	-2.23692
Fum3	-10.777
Gld2	-2.05223
Glt	-2.52481
GluClalpha	-6.40764
GluRIA	-31.6674
GluRIB	-2.68006
Glyat	-2.1301
Gpo2	-3.49899
Gr28b	-2.66674
Gr2a	-2.57883
Gr33a	-3.809
Gr39a	-2.57804
Gr43a	-3.56434
Gr59e	-2.00048
Gr59f	-2.09008
Gr5a	-3.23395
Gr66a	-17.1636
grass	-2.41889
Gss2	-2.21187
GV1	-4.9305
Gyc32E	-8.96918
Gycbeta100B	-24.0956
Hex-C	-3.80634
Hml	-22.4072
HP6	-3.39464
hydra	-5.95019
iav	-5.93996
Idgf1	-29.2038
IM14	-3.87652
Inx5	-2.42496
Ir31a	-2.17409
Ir60b	-2.82042
Irk2	-109.229
Irk3	-2.29585
ITP	-2.04773
Jhedup	-2.52807
Jon25Bi	-3.70608
Jon25Bii	-9.05533
Jon25Biii	-10.4282
Jon66Ci	-6.4096
kmg	-9.97416
l(2)01289	-5.08693
l(2)k05911	-6.40912
l(3)mbn	-63.9589
Lcp65Ac	-95.5372
Lcp65Ag3	-62.6728
Lcp9	-3.73083
lectin-22C	-17.7189
Lgr1	-2.3922
lin-28	-2.06873
Mdr65	-11.9257
Mkp	-3.26475
Mlc2	-4.87975
Mlp84B	-2.04454
ms(3)K81	-3.21875
mtt	-2.1358
Mur89F	-6.43695
nAChRalpha1	-2.30497
nAChRalpha2	-20.3884
nAChRalpha3	-3.50649
nAChRalpha6	-15.4845
nAChRalpha7	-2.41538
natalisin	-3.77592
Nckx30C	-4.57376
ND-B8	-2.09631
Nha1	-7.24858
NKCC	-3.73889
Nlg3	-38.167
Nlg4	-9.06025
Nmdar1	-2.93232
nompC	-2.17865
Nox	-4.35402
nSyb	-2.36529
Oatp33Ea	-2.24986
Obp44a	-15.6767
Obp47a	-23.9688
Obp49a	-26.5431
Obp56a	-10.8866
Obp56d	-56.6322
Obp83cd	-35.5466
Obp93a	-3.8397
ocn	-2.95918
Octalpha2R	-2.28326
Octbeta1R	-18.0076
Or33b	-3.86422
OtopLb	-17.617
Pal2	-4.49409
para	-3.51163
Peritrophin-15a	-5.67737
Peritrophin-A	-2.74622
Pgant4	-2.996
PGRP-SB1	-6.46254
PGRP-SC2	-24.1482
PGRP-SD	-6.75112
Pig1	-39.1055
Pkc53E	-3.82191
Pph13	-4.01615
Ppi1	-3.83909
ppk10	-8.56174
ppk20	-3.09541
ppk22	-6.56357
ppk30	-2.0584
Prm	-4.90239
Proc	-34.0486
Ptp52F	-18.7894
Ptth	-6.0832
PVRAP	-3.91052
Rab3-GEF	-2.11612
resilin	-2.38013
Rh6	-4.74833
RpL22-like	-2.69256
rpr	-2.11173
Rpt6R	-2.24369
Rtnl2	-2.33483
RYa-R	-3.83929
sals	-2.20039
scb	-2.11704
se	-8.40352
Ser8	-12.0866
SerT	-36.453
Sid	-14.9219
side-II	-2.78298
side-III	-2.15495
side-VI	-2.70096
side-VII	-2.08687
SIFa	-2.95262
SIFaR	-2.93475
sisRNA:CR46361	-2.30197
sit	-213.64
S-Lap2	-7.16284
slo	-5.63424
SmydA-2	-20.4657
SmydA-7	-2.03943
SmydA-9	-6.58115
snmRNA:254	-3.88469
snoRNA:Psi18S-525a	-2.68806
snoRNA:Psi18S-640g	-4.0121
snoRNA:Psi18S-996	-8.92356
snoRNA:Psi28S-1135b	-8.96443
Sodh-1	-2.90855
sosie	-4.52266
spab	-6.37631
stl	-2.92805
sut2	-2.47921
Swim	-9.83913
Syt14	-2.6158
Sytalpha	-2.39129
Tb	-16.2963
tbrd-2	-2.43133
Tektin-C	-7.30677
Tengl2	-4.00522
Tengl3	-123.154
Tim17b2	-11.0988
Tk	-14.0022
Tm2	-4.86876
Tmc	-28.0739
Tps1	-3.31799
tRNA:Arg-TCT-1-1	-3.83912
tRNA:Asn-GTT-1-9	-6.40033
trpl	-17.4124
Tsp29Fb	-2.364
Tsp42Ej	-2.3386
Tsp42Eo	-19.2094
Tsp42Eq	-12.9538
Twdlalpha	-104.992
TwdlE	-2.65819
unc-13-4A	-2.15251
unc-5	-2.03279
Unc-89	-6.39467
vnc	-4.01207
wry	-8.92887
y	-2.04652
yellow-d	-6.47761
yellow-e	-4.40483
ymp	-2.21803
ZnT33D	-8.93409

## Sheet: zldi
Gene ID	egfpi vs zldi Fold Change (0-1.5 hr)
18w	-3.60943
5-HT2A	-2.91406
AANATL6	-15.1468
AANATL7	-2.52865
abd-A	-2.60388
Abd-B	-3.07079
Ac3	-2.38705
Acp95EF	-4.01193
ACXE	-4.01194
Adgf-B	-4.01818
Alk	-2.30305
Ama	-3.24539
ana	-2.97719
Ance	-2.43622
Ance-2	-3.86145
Ance-3	-22.713
Antp	-2.77148
Arl6	-2.00985
Art2	-3.46556
ASPP	-3.29123
AstCC	-6.40141
atilla	-2.43891
B9d1	-54.4335
bab1	-6.36994
bab2	-2.44625
BBS1	-4.32858
BBS4	-2.09013
beat-IIIc	-2.96592
bib	-2.97904
blanks	-4.47027
bnb	-3.16544
bnl	-2.44551
BobA	-2.15735
boly	-17.1267
bou	-2.0043
bowl	-2.27152
Brd	-2.68997
brk	-2.90196
btd	-2.45458
btl	-3.3285
btsz	-2.12913
byn	-2.81155
C15	-3.34938
Cad74A	-3.92189
Cad88C	-2.55868
CadN	-2.92061
caup	-2.58301
CCKLR-17D3	-4.55958
Cdep	-2.25766
CG10035	-4.00686
CG10041	-2.68441
CG10064	-2.35053
CG10283	-3.41749
CG10307	-7.72702
CG10479	-3.16838
CG10553	-4.56372
CG10761	-2.67757
CG10764	-2.39858
CG10834	-4.0076
CG10859	-5.87968
CG10993	-3.84293
CG11068	-4.01191
CG11211	-3.35839
CG1124	-2.22162
CG1126	-7.01693
CG11327	-8.07916
CG11598	-3.25996
CG11600	-3.86657
CG11626	-2.12044
CG11668	-2.33644
CG11694	-4.25536
CG11698	-4.01196
CG11703	-20.2697
CG11756	-2.42537
CG11796	-3.46961
CG11835	-2.61867
CG11843	-2.85374
CG11852	-59.4825
CG12071	-2.1246
CG12133	-6.54394
CG12229	-4.01028
CG12344	-5.96864
CG12420	-3.45153
CG12496	-2.67674
CG12502	-3.5021
CG12541	-2.64304
CG12581	-2.61993
CG12730	-2.79892
CG12817	-4.2749
CG12869	-3.16751
CG12913	-2.06298
CG12923	-3.86679
CG12990	-3.44377
CG13010	-11.116
CG13074	-9.68112
CG13083	-2.17807
CG13144	-3.89876
CG13154	-5.59344
CG13203	-2.99301
CG13217	-3.20295
CG13251	-3.09588
CG13258	-10.1656
CG13293	-2.29468
CG13305	-4.32505
CG13358	-2.19961
CG13423	-4.9266
CG13427	-3.00376
CG13428	-8.53548
CG13436	-3.17129
CG13454	-2.74193
CG13457	-2.3798
CG13465	-2.17992
CG13617	-5.38811
CG13653	-2.18689
CG13743	-4.51321
CG13749	-2.0544
CG1387	-5.69915
CG13872	-8.08485
CG13894	-3.49887
CG14142	-3.85141
CG14183	-4.31752
CG14195	-2.39655
CG14313	-4.00982
CG14321	-3.58806
CG14339	-6.84108
CG14346	-3.47636
CG14367	-3.8344
CG14507	-5.41612
CG14551	-38.9719
CG14572	-2.85731
CG14589	-2.58679
CG14591	-3.33181
CG14624	-3.89866
CG14658	-2.16085
CG14662	-3.85659
CG14692	-28.0149
CG14770	-2.85497
CG14778	-3.85399
CG14829	-3.59473
CG14834	-3.39362
CG14915	-2.29363
CG14921	-3.2456
CG14932	-3.0135
CG14937	-3.05823
CG14947	-8.3731
CG15161	-4.66049
CG15169	-3.79488
CG15170	-3.48644
CG15336	-3.84728
CG15353	-3.8473
CG1545	-8.92573
CG15497	-2.40153
CG15526	-2.67931
CG15528	-12.4955
CG15530	-3.92991
CG15547	-3.04338
CG15579	-2.97422
CG15628	-3.87694
CG15650	-6.33848
CG1571	-8.64427
CG15865	-4.05846
CG15882	-6.39246
CG15923	-3.15482
CG16710	-2.57891
CG16758	-2.3811
CG16772	-10.5916
CG16825	-4.01589
CG1695	-4.01149
CG16984	-11.4197
CG17098	-9.93499
CG17118	-2.02146
CG17122	-3.5614
CG17207	-2.5961
CG17224	-2.00776
CG17264	-3.53908
CG17265	-2.12563
CG17329	-9.3037
CG17564	-2.44676
CG17687	-3.05075
CG17994	-3.37623
CG18155	-2.05783
CG18304	-2.10293
CG18327	-2.65576
CG18530	-2.73228
CG18754	-23.4409
CG18788	-4.01193
CG1909	-2.28845
CG2070	-6.40125
CG2120	-2.65324
CG2145	-2.64169
CG30015	-2.05723
CG30016	-4.65575
CG30037	-4.24808
CG30089	-2.94882
CG30099	-6.70381
CG30161	-2.61152
CG30271	-7.84144
CG30285	-2.60108
CG30289	-7.27657
CG30324	-2.52186
CG30383	-2.71325
CG30424	-3.00806
CG30428	-2.62879
CG30431	-2.48133
CG30432	-21.6501
CG30460	-2.02081
CG30484	-4.62639
CG30487	-6.98104
CG30495	-2.36088
CG31068	-6.40133
CG31106	-2.69919
CG31139	-6.53634
CG31141	-2.24827
CG31321	-3.1542
CG31404	-4.01034
CG31465	-2.05127
CG31469	-3.00336
CG31473	-3.37593
CG31642	-2.04629
CG31661	-3.84435
CG31710	-2.50466
CG31802	-4.0119
CG31817	-2.79618
CG31913	-4.46564
CG31988	-14.9082
CG32037	-2.47357
CG32053	-3.63308
CG32055	-2.10309
CG3213	-14.6497
CG32181	-3.3618
CG32187	-3.67486
CG32259	-2.12464
CG32280	-2.78954
CG32436	-2.9427
CG32445	-6.44381
CG3253	-2.91639
CG32599	-31.2446
CG32679	-10.6102
CG32706	-3.25948
CG32801	-3.70932
CG32808	-2.131
CG32982	-3.49501
CG33099	-2.37834
CG33120	-2.76674
CG33235	-18.6369
CG33339	-4.54221
CG33993	-2.45778
CG34012	-4.3071
CG34025	-4.74675
CG34057	-31.7166
CG34136	-2.22876
CG34138	-3.84407
CG34155	-2.57246
CG34193	-6.4118
CG34203	-4.01435
CG34224	-2.53013
CG34278	-2.62409
CG34307	-4.46443
CG34308	-16.2299
CG34324	-12.8864
CG34383	-2.75075
CG34402	-2.26435
CG34409	-3.30715
CG34442	-3.61048
CG34445	-2.71321
CG3502	-2.86578
CG3505	-2.40974
CG3565	-4.01192
CG3597	-6.53071
CG3955	-2.93516
CG4098	-2.05204
CG4133	-2.83366
CG4194	-2.28974
CG42266	-5.04229
CG42394	-2.75121
CG42404	-3.14097
CG42489	-2.11782
CG42535	-3.84393
CG42633	-2.57019
CG42691	-3.21193
CG42747	-2.31351
CG42751	-2.2321
CG42779	-2.76831
CG43248	-2.15198
CG4440	-3.09579
CG44437	-2.39179
CG4456	-4.01642
CG44569	-2.41386
CG45263	-2.61762
CG46304	-3.04563
CG4681	-2.63407
CG5002	-2.59704
CG5022	-2.54044
CG5059	-2.36734
CG5111	-11.3334
CG5162	-4.84587
CG5281	-3.01048
CG5592	-36.5749
CG5644	-4.01193
CG5665	-9.5793
CG5731	-2.1915
CG5888	-2.04061
CG5909	-3.05664
CG5945	-4.4641
CG5964	-2.91908
CG5984	-3.64378
CG6044	-4.55501
CG6154	-2.047
CG6405	-8.21588
CG6472	-3.84312
CG6576	-4.01194
CG6628	-16.0562
CG6753	-3.10754
CG6790	-6.13802
CG6845	-2.07522
CG6971	-3.31905
CG6999	-2.21127
CG7024	-2.19266
CG7058	-2.63563
CG7135	-28.5893
CG7164	-4.01198
CG7202	-3.4594
CG7203	-3.29933
CG7708	-2.19471
CG7755	-4.91844
CG7884	-3.10344
CG7886	-3.78318
CG7924	-3.25892
CG7950	-10.7399
CG8046	-4.4227
CG8117	-8.98782
CG8292	-9.56599
CG8358	-2.88796
CG8401	-6.59811
CG8407	-9.14784
CG8563	-3.94722
CG8564	-4.012
CG8586	-5.28492
CG8654	-3.32144
CG8834	-4.00695
CG9068	-2.9475
CG9072	-5.10115
CG9150	-6.42251
CG9220	-2.17151
CG9222	-6.39121
CG9270	-2.53568
CG9313	-6.67003
CG9483	-3.82475
CG9541	-6.70497
CG9664	-2.21334
CG9863	-2.25338
CG9961	-3.23266
CheA29a	-3.78322
CheA7a	-4.46364
CheA84a	-3.81789
CheA87a	-3.85293
CHKov2	-2.02558
chp	-3.39015
ci	-3.16769
comm	-4.28886
comm2	-2.9384
comr	-8.3271
conv	-2.73509
corn	-3.22702
Cpr47Eb	-2.25643
Cpr47Ec	-4.7361
Cpr47Eg	-9.57107
Cpr60D	-3.61204
Cpr66D	-2.21763
Cpr73D	-3.52863
CR11386	-9.96675
CR18275	-2.55263
CR33319	-3.64591
CR41379	-5.6782
CR41440	-5.09928
CR42490	-8.95962
croc	-2.79036
cry	-9.74716
Crz	-2.30596
cv-2	-3.19554
cv-c	-2.42862
cv-d	-2.07397
Cyp303a1	-3.76934
Cyp310a1	-2.84292
Cyp4ac2	-9.96972
Cyp6a8	-2.58044
Cyp6g2	-3.06029
Cys	-2.91125
d	-3.16847
D	-3.16847
dac	-2.31623
dally	-2.7715
Damm	-3.63856
dan	-3.38018
danr	-3.08002
Desi	-30.4066
Dfd	-3.02878
dib	-3.75963
Dic61B	-7.05809
disco	-3.24233
Dll	-2.26764
dmrt11E	-3.09775
DNaseII	-2.84043
Doc1	-2.87111
Doc2	-2.26851
Doc3	-3.67766
dpp	-3.25794
dpr12	-2.15602
dpr16	-6.5051
dpr17	-3.08551
dpr19	-2.25512
dpr20	-2.1445
dpr3	-3.69353
dpr7	-2.82901
Dr	-2.44631
Drat	-2.1484
drl	-2.35144
drm	-2.89275
ds	-2.83241
Dscam1	-3.35122
Dscam2	-3.67978
Dtg	-2.95494
dve	-2.25111
E(spl)m2-BFM	-2.16248
E(spl)m4-BFM	-2.41895
E(spl)m5-HLH	-2.577
E(spl)m6-BFM	-2.30798
E(spl)m7-HLH	-2.76351
E(spl)m8-HLH	-3.19996
E(spl)malpha-BFM	-2.96181
E(spl)mbeta-HLH	-2.85814
E(spl)mdelta-HLH	-2.74928
E(spl)mgamma-HLH	-2.5736
ec	-2.52966
Ect3	-3.62348
Edg78E	-3.06226
edl	-2.8822
Egfr	-2.72681
elav	-2.58493
ems	-2.96025
en	-3.09037
erm	-3.19887
Esp	-2.63153
et	-2.61168
eya	-2.4163
fan	-2.40156
fd96Cb	-2.0779
fiz	-2.48117
fj	-2.70875
fkh	-2.70382
Fs	-8.30964
ft	-3.03097
ftz	-2.39049
Fum3	-10.777
GABA-B-R2	-2.17153
gbb	-2.91575
gcm	-2.81545
gl	-2.14687
Gld2	-2.3859
Gli	-2.22943
Glut4EF	-2.43818
Glyat	-3.5896
Gp150	-3.19379
Gpb5	-4.68555
Gr28b	-3.85497
Gr2a	-8.21153
Gr39a	-5.13093
Gr43a	-4.42212
Gr59e	-6.36653
Gr59f	-3.5438
Gr5a	-2.11759
Gr61a	-2.16342
Gr63a	-2.49042
Gr66a	-2.33311
grh	-2.4192
grim	-3.50702
grn	-2.62972
grnd	-2.54285
gsb	-3.53263
Gsc	-2.05678
gt	-2.19608
Gyc32E	-8.96918
Gyc76C	-3.27354
Gyc89Da	-10.1399
ham	-2.72355
hbn	-3.03439
hbs	-2.65316
hh	-3.09805
hig	-2.14298
HisCl1	-6.09964
His-Psi:CR31614	-3.80625
hkb	-2.07838
HLH54F	-2.60592
HmgZ	-2.74378
Hmx	-4.67517
HP6	-5.49018
Hr38	-2.12421
Hsp70Bc	-23.6934
hth	-2.96081
htl	-2.63151
hydra	-3.20017
iav	-4.15254
ICA69	-2.07126
Ilp4	-2.72182
ImpE2	-3.64007
ImpL2	-3.17625
in	-2.54853
ind	-4.75794
inv	-3.42698
Inx3	-3.21909
Inx5	-3.81353
Inx6	-2.02243
Ir31a	-21.4812
Ir60b	-29.5088
Ir68a	-2.8647
Irk3	-2.31582
ITP	-2.02781
jbug	-2.91137
Jhedup	-4.00764
kl-5	-4.01411
klu	-2.46233
kmg	-9.97416
kn	-2.76272
kni	-2.23367
knrl	-2.40575
kon	-2.06543
Kr	-3.26431
ktub	-3.12379
Kua	-2.04545
l(1)sc	-2.19799
l(3)mbn	-63.9589
l(3)neo38	-2.70674
LanB2	-2.31304
Lcp65Ac	-7.30352
Lcp65Ag3	-16.0586
Lcp9	-4.63554
lectin-24Db	-13.2491
lft	-3.57811
lin-28	-2.51767
Lrt	-2.22459
Lsp1gamma	-4.06908
Lst	-2.91589
luna	-3.11674
Mdr49	-2.80744
melt	-2.51992
mew	-2.8141
Mgat2	-2.08691
mia	-2.3512
mid	-2.9089
miple1	-2.13911
Mipp1	-3.09567
mira	-3.33757
mirr	-3.17948
ms(3)76Cc	-2.01556
ms(3)K81	-23.1556
msl-2	-2.40525
nAChRbeta2	-3.14419
ND-B8	-8.97971
net	-3.43582
NetA	-2.28322
NimC4	-2.67685
ninaA	-9.11737
ninaB	-2.06786
ninaG	-10.508
nkd	-3.08837
noc	-2.49407
Notum	-2.66109
Nox	-4.54547
nrv2	-2.40971
nub	-2.93617
Oaz	-2.66012
Obp47a	-23.9688
Obp59a	-2.72939
Obp73a	-3.8173
Obp93a	-3.8397
Ocho	-2.78403
ocn	-11.6883
Octbeta1R	-2.8115
odd	-2.37574
ogre	-2.50689
opa	-2.53051
Optix	-2.48625
Or22a	-2.73043
Orct2	-2.03092
Oscillin	-2.22951
otk	-2.60568
otk2	-3.71861
p130CAS	-2.20546
pdm2	-3.75949
per	-2.1085
PH4alphaEFB	-2.47746
PHDP	-11.6051
phyl	-2.54648
pio	-2.02132
Pka-C3	-3.06128
pnr	-3.39685
Pp1-13C	-5.56475
Ppa	-2.90965
Ppi1	-3.83909
ppk10	-33.8431
ppk19	-3.62462
ppk20	-2.84218
ppk22	-6.56357
prd	-2.90276
Prdm13	-14.9027
pros	-2.44432
Prosbeta2R2	-3.34186
PsGEF	-2.5765
ptc	-3.18152
Ptp52F	-6.11286
Ptr	-2.38412
Ptth	-4.47317
Ptx1	-2.22349
Pvf3	-2.37441
Pvr	-2.01893
pxb	-2.8361
pyr	-2.71451
Ref2	-5.64574
resilin	-12.8437
Ret	-2.37585
Rh4	-3.60093
rho	-2.40206
Rhp	-2.09416
rib	-2.5887
robo1	-2.7665
robo2	-3.1661
Ror	-2.3031
RpL22-like	-6.38027
RpL37b	-5.03531
rpr	-2.94371
Rpt6R	-7.07196
rst	-2.01094
Rtnl2	-2.0148
rtp	-19.1751
run	-2.06695
ry	-3.13378
RYa-R	-3.83929
SA-2	-2.7243
sad	-2.87489
salm	-2.76857
sca	-3.71375
Scr	-2.35728
scrt	-2.19204
se	-8.40352
Ser8	-3.1563
Shroom	-2.12479
sick	-2.13018
Sid	-4.34453
side	-2.09485
side-V	-3.73474
side-VII	-2.9021
side-VIII	-2.43733
SIFa	-12.6045
sim	-2.30192
sisRNA:CR46357	-3.49147
sisRNA:CR46361	-2.6189
sisRNA:CR46363	-6.82333
sit	-72.0615
Six4	-6.08722
S-Lap2	-7.16284
sli	-2.70123
Sln	-2.11584
slp1	-2.95254
slp2	-2.99775
SmydA-2	-2.21613
SmydA-7	-3.93903
SmydA-9	-2.52472
sna	-2.30287
snmRNA:254	-3.88469
snoRNA:Psi18S-525a	-3.87926
snoRNA:Psi18S-640g	-4.0121
snoRNA:Psi28S-1135a	-6.45099
snoRNA:Psi28S-1135b	-8.96443
sob	-2.32054
Socs36E	-2.57828
sog	-2.59509
Sox14	-3.17982
SoxN	-3.13678
spdo	-2.52733
spo	-2.50437
spz3	-3.51318
srp	-2.00864
ste24b	-2.46186
stl	-4.15598
stumps	-3.10286
sty	-2.6893
sut2	-2.82547
Syt12	-2.45742
Syt14	-4.94384
tbrd-2	-3.11654
Teh2	-2.2449
Tektin-C	-2.21804
Ten-a	-2.03048
Tengl3	-3.09595
Tet	-2.54396
tey	-2.09602
ths	-3.68365
thw	-4.73184
Tim17b2	-11.0988
tin	-4.38704
tinc	-2.4837
Tmhs	-3.16209
tna	-2.27136
tok	-2.41415
Toll-6	-3.25655
Toll-7	-2.68388
Tom	-2.79511
Tps1	-2.4018
Trim9	-2.81983
trn	-3.30238
tRNA:Arg-TCT-1-1	-3.83912
tRNA:Asn-GTT-1-9	-6.40033
tsh	-2.25148
tup	-2.92245
tutl	-2.46728
Twdlalpha	-26.1576
twi	-2.84716
Ubx	-2.91857
Uhg5	-2.38163
uif	-2.50097
unc-13-4A	-3.34071
unc-5	-2.41466
upd2	-2.46669
VepD	-2.68004
vg	-2.13226
Vha16-3	-7.41968
vnc	-4.01207
vnd	-2.19488
wb	-3.10774
wg	-3.4055
wgn	-2.80918
Wnt2	-2.99532
wntD	-3.95549
yellow-e	-8.93044
yellow-e3	-3.30452
yellow-k	-9.42556
ymp	-7.81635
Z600	-2.28913
zfh2	-2.11735
ZnT33D	-8.93409

## Sheet: zld-clampi1
Gene ID	egfpi vs. zld/clampi1 Fold Change (0-1.5 hr)
AANATL2	-6.34588
AANATL4	-4.82461
AANATL6	-15.1468
AANATL7	-31.5573
AdamTS-A	-2.54521
atilla	-23.7534
bdl	-19.0663
bib	-4.99058
Bili	-2.24542
blanks	-2.49259
bt	-2.05698
btsz	-2.74155
CG11068	-4.01191
CG11400	-3.84837
CG11594	-2.52648
CG11626	-3.74396
CG12986	-3.4066
CG13160	-36.7969
CG13650	-2.10007
CG13653	-6.50747
CG14204	-3.00032
CG14262	-4.01539
CG14300	-46.5163
CG14864	-2.21652
CG1561	-2.609
CG15649	-7.25894
CG15760	-2.44348
CG1722	-3.42776
CG17906	-6.84633
CG18130	-2.12659
CG18327	-9.75355
CG1909	-3.0153
CG2962	-2.18423
CG30383	-3.52039
CG30460	-2.20639
CG31268	-6.23514
CG31802	-4.0119
CG32181	-2.41036
CG32182	-3.05634
CG32447	-2.90696
CG32750	-3.79273
CG33235	-18.6369
CG34205	-3.79569
CG34301	-3.63666
CG3777	-2.28549
CG43348	-3.81706
CG4335	-3.93653
CG43373	-3.89022
CG44532	-2.05294
CG44569	-14.2528
CG4928	-2.67474
CG5162	-10.2359
CG5945	-4.4641
CG6225	-3.07584
CG6403	-24.1824
CG6472	-3.84312
CG6576	-4.01194
CG7024	-2.5466
CG7387	-2.57187
CG8773	-7.28398
CG9505	-14.1382
CG9782	-3.84083
CR11386	-2.44479
CR18275	-2.32867
CR41440	-17.4114
Cyp4aa1	-2.21685
Cyp4ac1	-21.4779
Cyp4ac2	-9.96972
Cyp4g1	-2.36095
Dtg	-5.96757
ec	-3.41223
egr	-3.12098
Eh	-3.86867
Ent3	-2.55548
Fas2	-2.21303
fiz	-5.34911
FucTC	-2.30397
Fum3	-2.90592
Glt	-2.3213
Gr66a	-17.1636
Gyc32E	-8.96918
Gyc76C	-3.3329
Gyc89Da	-4.36984
iav	-4.48714
ICA69	-2.21584
Idgf1	-8.026
KCNQ	-8.98045
ktub	-3.17545
l(2)k05911	-12.732
nAChRalpha1	-2.47819
nAChRalpha2	-2.74159
nAChRalpha5	-2.22024
nAChRalpha6	-11.0803
nAChRalpha7	-2.13162
nAChRbeta2	-6.17681
natalisin	-3.77592
NKCC	-29.6369
noc	-4.22763
nSyb	-3.35081
Obp47a	-23.9688
Obp56d	-56.6322
otk	-2.90934
otk2	-2.63095
Pal2	-9.03926
Pepck2	-2.57203
Peritrophin-15a	-45.394
Prat2	-2.49705
Ptp52F	-15.9021
Rab3-GEF	-2.95444
Ret	-2.78002
Rph	-3.1188
RpL22-like	-5.26044
Rpt6R	-4.60316
run	-3.30537
SerT	-9.67807
sick	-2.76129
SLC22A	-2.28566
smog	-2.12018
sog	-4.55332
sosie	-8.62346
spab	-6.37631
Tmhs	-3.90817
toy	-2.3389
Tsp2A	-2.28441
wry	-5.23613
ZnT33D	-8.93409
18w	-4.45869
5-HT2A	-8.73989
5-HT2B	-3.78753
7B2	-4.0685
ab	-2.45563
abd-A	-2.98357
Abd-B	-3.50078
ac	-3.22201
Ac3	-3.29719
Ac78C	-3.90173
Ace	-3.25733
Acp95EF	-4.01193
ACXE	-4.01194
Adgf-B	-4.01818
Adgf-C	-19.0347
Adgf-D	-11.8844
Alk	-4.33539
Ama	-4.23685
ana	-6.3779
Ance	-3.87862
Ance-2	-7.5824
Ance-3	-6.51775
Antp	-4.30368
antr	-2.18933
AQP	-8.96949
Arp53D	-20.4637
Arr2	-15.4655
Art2	-6.7399
ASPP	-4.78882
AstCC	-6.40141
Atet	-3.2377
b6	-17.7819
B9d1	-8.01721
bab2	-2.89387
BBS1	-3.98021
BBS4	-2.81038
BBS8	-4.90237
beat-IIIc	-4.34255
Blimp-1	-2.572
bnb	-4.80527
bnk	-2.36764
bnl	-3.5501
BobA	-6.78206
boly	-17.1267
bou	-3.35126
bowl	-2.7465
Brd	-5.00264
brk	-3.59493
Bro	-2.24095
Bsg25A	-2.39121
btd	-3.93173
btl	-4.53045
byn	-5.77111
C15	-3.54285
Ca-alpha1T	-5.69143
Cad74A	-6.3574
Cad88C	-7.23978
CadN	-3.4434
CanA1	-39.5508
caup	-3.29319
Cbp53E	-15.174
CCKLR-17D3	-3.84472
Cda9	-7.24325
CDase	-5.22368
Cdep	-2.90903
CG10035	-7.55863
CG10051	-2.82796
CG10063	-4.16025
CG10140	-4.18651
CG10168	-4.54259
CG10185	-3.79368
CG10205	-31.4941
CG10283	-3.39571
CG10307	-5.38672
CG10311	-7.69584
CG10405	-4.06708
CG10472	-13.7673
CG10479	-4.28399
CG10553	-9.66103
CG10591	-2.25668
CG10592	-34.6203
CG10657	-6.18021
CG10663	-2.71855
CG10761	-2.45446
CG10764	-2.24026
CG10859	-4.38365
CG1090	-3.53792
CG10931	-4.01004
CG10993	-3.84293
CG11018	-5.43534
CG11023	-14.9869
CG11029	-9.1303
CG11211	-2.64044
CG1124	-2.7845
CG11251	-4.49199
CG11327	-5.93736
CG1139	-6.59891
CG1143	-5.87011
CG11498	-2.90644
CG11608	-6.1271
CG11668	-13.4974
CG11694	-23.2553
CG11698	-4.01196
CG11756	-2.60182
CG11796	-32.4829
CG11835	-3.31266
CG11842	-6.54203
CG11843	-2.20561
CG11852	-59.4825
CG12057	-7.50636
CG12071	-2.83733
CG12105	-3.70447
CG12133	-5.64977
CG12164	-19.1251
CG12194	-2.17199
CG12239	-4.29623
CG12344	-8.80515
CG12420	-8.83347
CG1246	-2.17568
CG12496	-5.1465
CG12541	-10.6637
CG12581	-4.48015
CG12730	-4.39812
CG12817	-7.61677
CG12826	-26.7053
CG12869	-2.25309
CG12913	-2.12001
CG12923	-3.86679
CG12934	-20.4369
CG12963	-48.3872
CG12974	-3.26376
CG12990	-3.26659
CG13010	-2.70707
CG13029	-2.62205
CG13038	-8.99883
CG13074	-9.68112
CG13081	-4.01386
CG13108	-3.10577
CG13124	-2.01809
CG13144	-3.89876
CG13203	-5.16722
CG13216	-2.16807
CG13217	-9.34055
CG1324	-5.65107
CG13248	-4.19944
CG13251	-3.62369
CG13255	-30.4605
CG13258	-2.54425
CG13300	-2.12857
CG13326	-2.29384
CG13358	-3.73149
CG13423	-4.15408
CG13427	-6.78877
CG13428	-31.1809
CG13436	-3.14821
CG13454	-3.85316
CG13465	-6.33477
CG13492	-2.24865
CG13617	-18.5089
CG13654	-3.1764
CG13679	-25.6578
CG13692	-3.85945
CG13711	-2.04454
CG13739	-13.6049
CG13743	-6.04063
CG13749	-2.52431
CG13806	-2.44932
CG13810	-2.26491
CG13868	-3.16932
CG1387	-11.484
CG13872	-8.08485
CG13894	-4.19527
CG14050	-2.06613
CG14111	-9.78073
CG14142	-3.85141
CG14183	-2.15469
CG14195	-4.38646
CG14205	-3.25154
CG14227	-4.38852
CG14274	-2.15751
CG14275	-3.84814
CG14291	-2.98044
CG14292	-184.583
CG14304	-3.5332
CG14317	-3.80599
CG14321	-4.91157
CG14339	-6.84108
CG14346	-8.60639
CG14367	-3.06329
CG14427	-2.74759
CG14451	-2.41275
CG14453	-34.2515
CG14457	-17.9702
CG14507	-2.06153
CG14515	-4.36561
CG14551	-3.53546
CG14572	-19.1404
CG14589	-4.06045
CG14591	-60.3792
CG14624	-3.89866
CG14664	-6.96827
CG1468	-69.1042
CG14692	-15.9749
CG14694	-7.91085
CG14770	-3.8806
CG14778	-3.18015
CG14829	-7.36178
CG14830	-2.08615
CG14915	-4.42518
CG14921	-2.08648
CG14932	-3.59164
CG14937	-5.0015
CG14947	-26.208
CG14949	-59.1773
CG14963	-3.73598
CG14982	-6.36628
CG14984	-21.5522
CG15043	-4.32251
CG15082	-13.255
CG15125	-3.54883
CG15128	-5.65055
CG15161	-12.2917
CG15170	-10.7573
CG15201	-16.6311
CG15213	-40.1588
CG15332	-9.5568
CG15336	-3.84728
CG15353	-3.8473
CG15382	-2.18088
CG15406	-38.1239
CG15412	-2.87391
CG15431	-31.782
CG1545	-8.92573
CG15497	-5.2419
CG15517	-3.81951
CG15526	-8.64979
CG15528	-12.4955
CG15530	-2.39004
CG15533	-3.93599
CG15534	-70.775
CG15546	-7.25279
CG15547	-4.81602
CG15556	-18.9132
CG15625	-4.72673
CG15628	-6.36785
CG15650	-6.33848
CG1571	-15.7969
CG15772	-4.01736
CG15824	-8.96145
CG15829	-4.73907
CG15865	-12.9983
CG15876	-2.13612
CG15882	-5.12938
CG15905	-3.56543
CG15923	-2.60928
CG16710	-3.6455
CG1674	-4.47216
CG16758	-3.11007
CG16772	-2.55527
CG16775	-6.34533
CG16791	-2.32176
CG16820	-27.3646
CG16825	-4.01589
CG16886	-18.4543
CG16888	-4.11605
CG16965	-2.47068
CG16984	-3.18397
CG17032	-3.25467
CG17083	-4.01389
CG17098	-2.3545
CG17111	-4.40106
CG17118	-2.24378
CG17119	-2.78289
CG17122	-11.5652
CG17147	-6.37064
CG17207	-9.57321
CG17264	-4.26392
CG17267	-4.41954
CG17278	-3.81257
CG17329	-2.49689
CG17549	-2.6976
CG17562	-2.82968
CG17564	-2.33518
CG17687	-4.97164
CG17739	-2.705
CG17991	-6.91854
CG17994	-4.76304
CG18095	-9.04863
CG18258	-8.94459
CG18266	-7.52289
CG18304	-2.50774
CG18628	-9.0858
CG18635	-5.13074
CG18754	-3.45228
CG18788	-4.01193
CG2070	-6.40125
CG2120	-2.0951
CG2145	-7.58147
CG2269	-24.6504
CG2650	-38.1583
CG2680	-2.81088
CG2681	-2.4189
CG2736	-2.3256
CG2781	-8.76819
CG2930	-2.8133
CG30015	-2.82023
CG30016	-5.25036
CG30036	-3.29918
CG30037	-14.5883
CG30089	-4.2385
CG30091	-4.0479
CG30099	-3.23101
CG30158	-17.8731
CG30161	-2.63899
CG30172	-5.22893
CG30187	-2.75782
CG30259	-3.80869
CG30271	-10.219
CG30289	-6.72358
CG30324	-2.9372
CG30380	-7.08536
CG30419	-4.23785
CG30424	-3.99452
CG30427	-11.1563
CG30428	-3.85877
CG30431	-2.35132
CG30432	-5.73828
CG30484	-4.71845
CG30486	-5.8586
CG30487	-6.98104
CG31030	-2.18505
CG31068	-6.40133
CG31106	-15.8896
CG31125	-2.57509
CG31141	-5.83912
CG31161	-2.10763
CG31233	-6.01251
CG31313	-4.96133
CG31321	-11.3005
CG31343	-46.3676
CG31404	-4.01034
CG31465	-17.5664
CG31469	-3.99767
CG31473	-2.63021
CG31516	-2.5999
CG31546	-2.18474
CG31642	-6.6147
CG31661	-3.84435
CG31776	-3.77079
CG31817	-4.43745
CG31871	-4.24989
CG3191	-2.2813
CG31913	-4.46564
CG31988	-14.9082
CG32036	-7.84855
CG32037	-3.07151
CG32052	-2.69553
CG32053	-3.58963
CG32055	-7.18406
CG3213	-14.6497
CG32187	-7.25161
CG32199	-3.88505
CG32201	-6.98916
CG32259	-2.86552
CG32280	-3.15334
CG32368	-22.1514
CG32392	-3.39269
CG32436	-2.69485
CG32445	-6.44381
CG3246	-2.24291
CG32483	-2.93958
CG32506	-2.97911
CG3253	-4.70965
CG32557	-9.69806
CG3257	-2.36212
CG32679	-88.5274
CG3270	-2.91518
CG32706	-4.62675
CG32801	-5.35293
CG32808	-3.57739
CG32815	-2.05151
CG3292	-123.903
CG32982	-5.93459
CG33080	-7.24053
CG33099	-3.76083
CG33120	-2.11369
CG33143	-2.34882
CG33178	-2.2793
CG33253	-3.05692
CG33267	-2.40861
CG3328	-2.21868
CG33281	-17.6679
CG3348	-18.1138
CG33494	-2.57462
CG33514	-4.87734
CG33926	-5.57395
CG34012	-3.59303
CG34025	-16.2333
CG34034	-2.32154
CG34043	-7.75511
CG34056	-2.58083
CG34057	-2.46596
CG34124	-2.72141
CG34136	-4.49653
CG34138	-3.84407
CG34155	-7.05356
CG34184	-5.15415
CG34193	-6.4118
CG34214	-3.82325
CG34224	-5.17653
CG34232	-3.13011
CG34268	-4.63337
CG34278	-9.03813
CG34307	-4.46443
CG34308	-4.35372
CG34324	-12.8864
CG34354	-3.48462
CG34382	-43.5624
CG34383	-3.7197
CG34402	-15.9635
CG34409	-3.15668
CG34442	-12.9854
CG34445	-4.85027
CG34454	-17.5247
CG3502	-5.84014
CG3556	-2.41085
CG3565	-4.01192
CG3597	-4.8975
CG3598	-18.3105
CG3635	-6.59162
CG3706	-3.39399
CG3868	-14.6271
CG3955	-4.74232
CG3984	-3.88347
CG40486	-4.48648
CG4096	-2.45636
CG4133	-2.85958
CG4194	-2.90131
CG4213	-2.0941
CG42255	-2.85323
CG42322	-5.29368
CG42335	-2.13127
CG42390	-2.58754
CG42394	-3.70662
CG42404	-6.5235
CG42494	-2.47049
CG42535	-3.84393
CG42564	-2.8846
CG42613	-4.58771
CG42633	-8.4986
CG42691	-43.8846
CG42741	-4.46092
CG42747	-2.76254
CG42750	-2.26351
CG42751	-11.0989
CG42762	-6.94982
CG42763	-7.01404
CG42779	-29.08
CG4324	-2.42695
CG4362	-15.406
CG4367	-20.227
CG43675	-4.95269
CG43707	-6.72749
CG4440	-7.12411
CG44403	-3.89415
CG44422	-3.53062
CG44433	-3.84975
CG44437	-25.9272
CG4459	-25.6037
CG4462	-27.0758
CG44625	-3.77583
CG4525	-3.75458
CG45263	-4.2423
CG4577	-61.2121
CG4582	-2.16419
CG46304	-2.55189
CG4681	-2.67363
CG4741	-4.32424
CG4829	-2.37774
CG4836	-27.4509
CG5002	-6.20849
CG5022	-2.76432
CG5059	-3.41916
CG5111	-10.4477
CG5150	-7.42241
CG5160	-4.70316
CG5171	-2.07337
CG5177	-3.31287
CG5281	-2.95046
CG5592	-9.84453
CG5644	-4.01193
CG5665	-2.36933
CG5731	-2.82697
CG5853	-2.07411
CG5867	-18.9281
CG5888	-3.51043
CG5895	-16.7903
CG5909	-15.9842
CG5910	-2.91424
CG5964	-6.77435
CG6012	-9.83259
CG6041	-2.43874
CG6044	-31.6046
CG6071	-5.43545
CG6125	-7.43454
CG6154	-3.78643
CG6405	-3.97607
CG6432	-3.65175
CG6465	-2.49805
CG6484	-5.7473
CG6569	-3.0583
CG6592	-6.8284
CG6628	-25.458
CG6753	-3.45562
CG6790	-5.9154
CG6845	-2.44052
CG6885	-2.76444
CG6901	-3.78151
CG6938	-37.9388
CG6971	-3.18173
CG6978	-15.3056
CG6999	-14.9571
CG7058	-2.1346
CG7079	-6.76396
CG7135	-2.85516
CG7164	-4.01198
CG7179	-4.31102
CG7191	-4.63061
CG7202	-8.37427
CG7203	-60.5823
CG7271	-4.78637
CG7290	-74.2313
CG7298	-13.1341
CG7299	-60.559
CG7367	-13.234
CG7465	-301.965
CG7560	-33.2598
CG7708	-6.99454
CG7724	-3.89211
CG7755	-2.89385
CG7794	-9.20102
CG7884	-5.69905
CG7886	-2.99292
CG7916	-11.8504
CG7924	-3.03233
CG7950	-10.7399
CG7953	-6.42538
CG7963	-3.18295
CG8008	-7.01066
CG8046	-6.37676
CG8086	-4.36553
CG8093	-3.68537
CG8117	-8.98782
CG8192	-3.23823
CG8358	-2.68357
CG8369	-6.09375
CG8401	-5.15415
CG8468	-2.10568
CG8563	-22.1646
CG8564	-4.012
CG8586	-2.75663
CG8654	-7.60288
CG8708	-2.01914
CG8834	-7.01076
CG8852	-5.19748
CG8960	-5.47618
CG9021	-2.08244
CG9068	-5.75337
CG9072	-12.9432
CG9129	-2.27143
CG9150	-6.42251
CG9192	-4.00705
CG9220	-3.97674
CG9222	-6.3329
CG9270	-4.17309
CG9279	-2.41341
CG9289	-2.55964
CG9297	-42.9714
CG9313	-2.10818
CG9394	-7.46344
CG9483	-3.82475
CG9512	-2.63199
CG9541	-3.97798
CG9555	-2.64597
CG9593	-6.51074
CG9664	-3.312
CG9701	-24.7768
CG9702	-10.7833
CG9760	-40.6436
CG9876	-2.53413
CG9961	-2.99219
CG9988	-4.50161
CG9993	-9.39812
CheA29a	-3.78322
CheA7a	-4.46364
chp	-3.05741
Cht6	-3.74992
ci	-5.43513
comm	-3.91859
comm2	-3.63057
comr	-28.2005
conv	-3.1238
Corin	-4.47004
corn	-4.68649
Cpr31A	-66.9029
Cpr35B	-2.43472
Cpr47Eb	-142.687
Cpr47Ec	-14.0396
Cpr47Eg	-143.164
Cpr56F	-56.9493
Cpr60D	-2.40779
Cpr64Ad	-4.49872
Cpr66Cb	-3.40102
Cpr66D	-2.52394
Cpr73D	-5.24114
Cpr78Cb	-8.62968
CR33319	-21.3365
CR41379	-2.95055
CR42490	-8.95962
croc	-5.53312
Crz	-2.81443
cv-2	-5.87236
cv-c	-3.22801
cv-d	-2.13792
Cyp12a5	-3.31917
Cyp28d1	-9.38092
Cyp310a1	-5.18135
Cyp312a1	-6.26235
Cyp4d1	-2.76936
Cyp4d14	-6.23217
Cyp4d2	-3.54775
Cyp6a8	-3.79196
Cyp6d5	-3.15996
Cyp6g2	-2.03191
Cyp9c1	-14.1503
Cys	-5.10997
cysu	-2.32901
D	-4.94995
d	-4.94995
dac	-2.93017
dally	-4.15628
Damm	-2.33854
dan	-8.65646
danr	-9.62589
daw	-3.28478
Desat2	-19.7653
Dfd	-5.00981
Dh31	-9.31718
Dh31-R	-2.89527
Dh44	-12.2958
dib	-8.42602
Dic61B	-3.34007
disco	-3.9977
Dll	-3.46675
dmrt11E	-3.67925
DNaseII	-2.65857
Doc1	-4.63949
Doc2	-3.21388
Doc3	-4.74318
dpn	-2.74987
dpp	-4.25868
dpr1	-17.4224
dpr12	-3.12328
dpr16	-5.44284
dpr17	-5.78249
dpr19	-2.1452
dpr2	-3.49871
dpr20	-8.20628
dpr21	-6.45788
dpr3	-7.35575
dpr7	-5.1071
Dr	-3.05265
Drat	-3.23392
drl	-2.71541
drm	-3.68578
ds	-4.10791
dsb	-6.45432
Dscam1	-4.33674
Dscam2	-4.35793
dve	-3.02076
E(spl)m2-BFM	-3.3042
E(spl)m3-HLH	-2.26358
E(spl)m4-BFM	-4.09284
E(spl)m5-HLH	-5.80597
E(spl)m7-HLH	-3.58806
E(spl)m8-HLH	-3.86434
E(spl)malpha-BFM	-3.16502
E(spl)mbeta-HLH	-2.0445
E(spl)mdelta-HLH	-3.48509
E(spl)mgamma-HLH	-3.85967
Ect3	-3.83667
Edg78E	-5.35001
edl	-3.63244
Egfr	-3.94312
Elal	-7.57609
elav	-3.05507
ems	-3.81259
en	-3.69534
erm	-5.86517
esg	-2.56394
Esp	-3.86915
Esyt2	-3.3545
et	-3.25839
etaTry	-6.49016
Ets21C	-2.51361
eve	-4.03838
exex	-3.19699
eya	-3.18198
FASN2	-2.49483
FASN3	-3.67126
fd96Cb	-3.68655
fj	-3.86998
fkh	-3.77838
Fs	-8.43981
ft	-3.36658
ftz	-5.527
GABA-B-R2	-3.11082
Gal	-2.42295
Gasp	-3.3182
Gat	-2.76635
GATAe	-2.43248
gbb	-3.938
gcm	-3.64336
gcm2	-4.01049
gl	-3.4408
Gld	-9.95559
Gld2	-9.684
Gli	-2.25748
GluClalpha	-3.15381
GluRIA	-31.6674
GluRIB	-4.70618
Glut4EF	-2.6836
Glyat	-5.11802
gogo	-2.41063
Gp150	-4.44437
Gpb5	-3.58207
Gpo2	-4.03166
gprs	-3.13708
Gr28b	-3.17999
Gr2a	-28.2834
Gr32a	-2.40399
Gr33a	-3.809
Gr43a	-15.0981
Gr59e	-3.81414
Gr59f	-3.26181
Gr5a	-2.77513
grh	-3.40869
grn	-3.59
grnd	-4.14544
gsb	-4.60172
Gsc	-4.88036
Gss2	-3.16639
gt	-3.62233
GV1	-5.09409
Gyc89Db	-2.23369
Gycbeta100B	-6.01411
halo	-3.50302
ham	-3.56053
hbn	-8.15323
hbs	-2.68016
Hex-C	-3.80634
hh	-4.9665
hig	-2.52966
HisCl1	-4.79213
His-Psi:CR31614	-3.80625
hkb	-4.2912
HLH54F	-2.8684
HmgZ	-4.61419
Hml	-97.0587
Hmx	-5.03349
HP6	-45.7229
Hr38	-3.72637
Hsp70Bbb	-6.41649
Hsp70Bc	-23.6934
hth	-4.85728
htl	-5.13836
if	-3.15749
Ilp4	-4.91254
ImpL2	-4.71332
in	-3.00877
inaD	-2.62572
ind	-5.92086
inv	-2.54713
Inx3	-4.93245
Inx5	-3.12027
Inx6	-6.86696
Ir31a	-19.256
Ir60b	-4.41329
Ir68a	-5.06271
Ir93a	-6.44648
Irk2	-29.847
Irk3	-3.15124
ITP	-3.30483
jbug	-4.68402
Jhe	-4.34026
Jhedup	-2.70655
Jon25Bi	-9.59559
Jon25Biii	-31.0417
Jon44E	-3.79997
Jon66Ci	-6.4096
jp	-2.78084
Kank	-3.06018
kar	-2.07989
kat-60L1	-4.06583
Kif3C	-3.5516
kl-5	-4.01411
klu	-2.46081
kmg	-9.97416
kn	-2.27488
kni	-3.86567
knrl	-4.24493
ko	-2.10913
kon	-2.24852
Kr	-4.49938
l(1)sc	-3.76907
l(2)01289	-5.11714
l(3)mbn	-63.9589
l(3)neo38	-3.50511
lab	-3.11369
LanA	-2.27323
LanB1	-2.09325
LanB2	-2.70101
Lcp65Ac	-95.5372
Lcp65Ag3	-490.184
Lcp9	-15.7277
Ldh	-2.08625
lectin-22C	-4.22884
lft	-4.90696
Lim1	-2.24537
lin-28	-2.54456
Lrt	-2.74524
Lsp1gamma	-6.64918
Lst	-6.85235
mas	-2.64787
Mdr49	-5.73916
Mdr50	-7.17783
Mdr65	-2.9328
Mec2	-3.43116
melt	-5.24008
mew	-4.72034
mex1	-3.08683
mfas	-2.62518
Mgat2	-2.70685
mia	-2.82148
mid	-4.05079
Mid1	-2.09709
miple1	-3.22493
Mipp1	-4.73315
mira	-5.11358
mirr	-3.47601
Mlc2	-4.56629
Mlp84B	-2.66251
ms(3)76Cc	-4.0215
msl-2	-3.49172
mspo	-2.52997
mthl14	-6.93523
mthl2	-2.2974
mtt	-19.2932
Muc14A	-2.10428
Mur89F	-28.185
nan	-2.18054
Nckx30C	-5.71143
Ndae1	-3.23021
net	-7.21161
NetA	-2.96099
NetB	-3.53
Neto	-2.1915
Nha1	-7.24858
Nhe2	-2.1771
niki	-2.2796
NimC4	-2.31248
ninaA	-9.11737
ninaB	-2.93421
ninaG	-2.01873
nkd	-5.27503
Nlg3	-5.62089
Nlg4	-2.18344
Nmdar1	-2.044
Notum	-3.85824
Nox	-10.4585
Npc2f	-2.76024
Nplp2	-2.82279
nrv2	-3.23916
nub	-3.51643
Oatp33Ea	-3.31596
Oatp74D	-2.68066
Oaz	-2.81182
Obp44a	-54.7331
Obp49a	-6.30702
Obp56a	-15.7901
Obp59a	-5.44114
Obp73a	-3.8173
Obp83cd	-5.23376
Obp93a	-3.8397
Obp99a	-3.27406
oc	-3.13716
Ocho	-4.12089
ocn	-11.6883
Octbeta1R	-7.29122
odd	-5.09181
ogre	-2.90399
opa	-5.99947
Optix	-5.16924
Or22a	-5.52676
Or22b	-4.01391
Or33b	-3.86422
Orct	-2.76461
Orct2	-2.53785
Oscillin	-2.8151
p130CAS	-3.33621
para	-5.67386
Pde8	-2.49666
pdm2	-4.44196
Pebp1	-11.1429
Peritrophin-A	-2.90348
PGRP-SB1	-16.72
PGRP-SC2	-24.1482
PGRP-SD	-6.75112
PH4alphaEFB	-4.66803
PH4alphaNE3	-6.86239
PHDP	-11.6051
phyl	-4.23474
Pig1	-39.1055
pio	-3.5361
Pka-C3	-6.47117
Pkc53E	-4.04434
pnr	-4.45128
Pp1-13C	-5.58267
Ppa	-4.43213
Ppi1	-3.83909
ppk10	-33.8431
ppk20	-2.22668
ppk22	-6.56357
ppk30	-3.00076
prd	-6.76573
Prdm13	-2.38916
Prm	-4.6591
Proc	-8.09225
pros	-3.49477
Prosbeta2R2	-2.78579
ps	-2.45374
PsGEF	-3.81172
ptc	-4.61628
Ptr	-5.72237
Ptth	-6.20948
Ptx1	-2.35635
Pvf3	-3.26401
Pvr	-2.17462
PVRAP	-4.14643
pxb	-3.68071
Pxd	-2.99207
Pxn	-2.41619
pyr	-4.42469
Rbp4	-2.49075
Rcd2	-2.19862
Ref2	-5.11147
resilin	-6.29268
Rh4	-4.88127
Rh6	-20.1707
rho	-3.31378
RhoGAP102A	-3.11039
RhoL	-2.22436
rib	-3.04279
RluA-1	-2.47849
robo1	-3.17038
robo2	-4.48957
rpr	-4.2042
rst	-2.36928
Rtnl2	-2.0202
rtp	-19.1751
ry	-5.75644
RYa-R	-3.83929
SA-2	-2.4976
sad	-3.54699
salm	-3.61722
sano	-2.34214
sas	-3.13423
sca	-5.49689
scb	-2.10113
Scgalpha	-3.41472
Scr	-3.11317
scrt	-3.35195
se	-8.40352
Ser8	-2.94975
sev	-5.17154
shd	-2.57406
Shroom	-3.51017
side	-2.37565
side-II	-2.95235
side-III	-3.62957
side-V	-4.64905
side-VII	-3.89819
side-VIII	-41.8733
SIFa	-12.6045
SIFaR	-2.4115
sim	-3.64553
sisA	-4.06081
sisRNA:CR46357	-4.84821
sisRNA:CR46360	-2.04447
sisRNA:CR46361	-9.02388
sit	-213.64
Six4	-3.47027
skl	-2.60906
sli	-3.95534
slo	-3.00988
slp1	-4.11315
slp2	-4.42835
Smyd4-2	-4.14569
SmydA-2	-4.98208
SmydA-4	-2.75545
SmydA-5	-2.80741
SmydA-7	-3.13238
SmydA-9	-29.0964
sna	-4.39102
SNCF	-3.16098
snoRNA:Psi18S-301	-2.36138
snoRNA:Psi18S-525a	-11.5191
snoRNA:Psi18S-640g	-4.0121
snoRNA:Psi18S-920	-6.23324
snoRNA:Psi28S-1135a	-6.45099
snoRNA:Psi28S-1135b	-2.22425
sob	-3.65705
Socs36E	-3.83262
Sodh-1	-5.83211
Sox14	-3.65505
SoxN	-5.0351
Sp1	-2.71938
SP2353	-2.18396
spdo	-3.14148
spo	-5.67929
sprt	-2.25144
spz3	-3.23244
srp	-2.33864
stl	-2.74747
stumps	-4.99216
sty	-3.04942
sut2	-3.61629
svp	-2.01448
Swim	-17.8542
Syt14	-3.79401
Sytalpha	-19.0799
Tb	-16.2963
Teh2	-4.20677
Teh3	-3.69776
Tektin-C	-2.46963
Ten-a	-2.50957
Tengl3	-3.09614
term	-3.70423
Tet	-3.59556
tey	-2.60193
ths	-5.65233
Tim17b2	-11.0988
tin	-6.4012
tinc	-4.11582
Tk	-14.0022
tld	-3.83984
tll	-3.4673
Tm2	-4.99144
tna	-3.48306
tok	-4.45032
Toll-6	-4.33106
Toll-7	-2.85859
Toll-9	-40.2646
Tom	-4.62361
tomboy40	-4.25114
Tps1	-2.42924
Trim9	-3.37853
trn	-4.53291
tRNA:Arg-TCT-1-1	-3.83912
tRNA:Asn-GTT-1-9	-6.40033
trpl	-17.4124
tsg	-2.29311
tsh	-2.39073
tsl	-2.80049
Tsp33B	-3.83003
Tsp42Ej	-2.18823
Tsp42Eo	-19.2094
Tsp42Eq	-3.16804
Tsp5D	-2.64537
tup	-2.9744
tutl	-3.05942
Twdlalpha	-104.992
TwdlE	-77.2868
twi	-5.79295
TyrR	-6.45042
Ubx	-2.93797
Uhg5	-2.43444
uif	-3.96003
unc-13-4A	-4.08493
unc-5	-3.55879
Unc-89	-8.41383
upd2	-12.4912
veil	-7.37594
VepD	-5.23881
vg	-2.54454
VGAT	-20.2959
VGlut	-3.11993
Vha16-3	-7.41968
Vha16-5	-6.00675
vnc	-4.01207
vnd	-3.982
wb	-3.84236
wg	-4.46401
wgn	-4.88994
Whamy	-4.44054
Wnt2	-3.05645
Wnt4	-2.12925
wntD	-5.981
yellow-d	-2.23189
yellow-e	-11.4379
yellow-e2	-4.37912
yellow-e3	-3.85467
yellow-k	-9.42556
ymp	-29.4483
Z600	-4.69315
Zasp52	-4.28376
zen	-2.67065
zen2	-2.47277
zfh2	-2.56722
